# Supplementary material for: Gain-of-Function p53N236S Mutation Drives the Bypassing of HRasV12-Induced Cellular Senescence via PGC–1α
Source: MDPI journal article supplement (doi:10.3390/ijms24043790), 2023-02-14
Supplement: s1 [file s1]

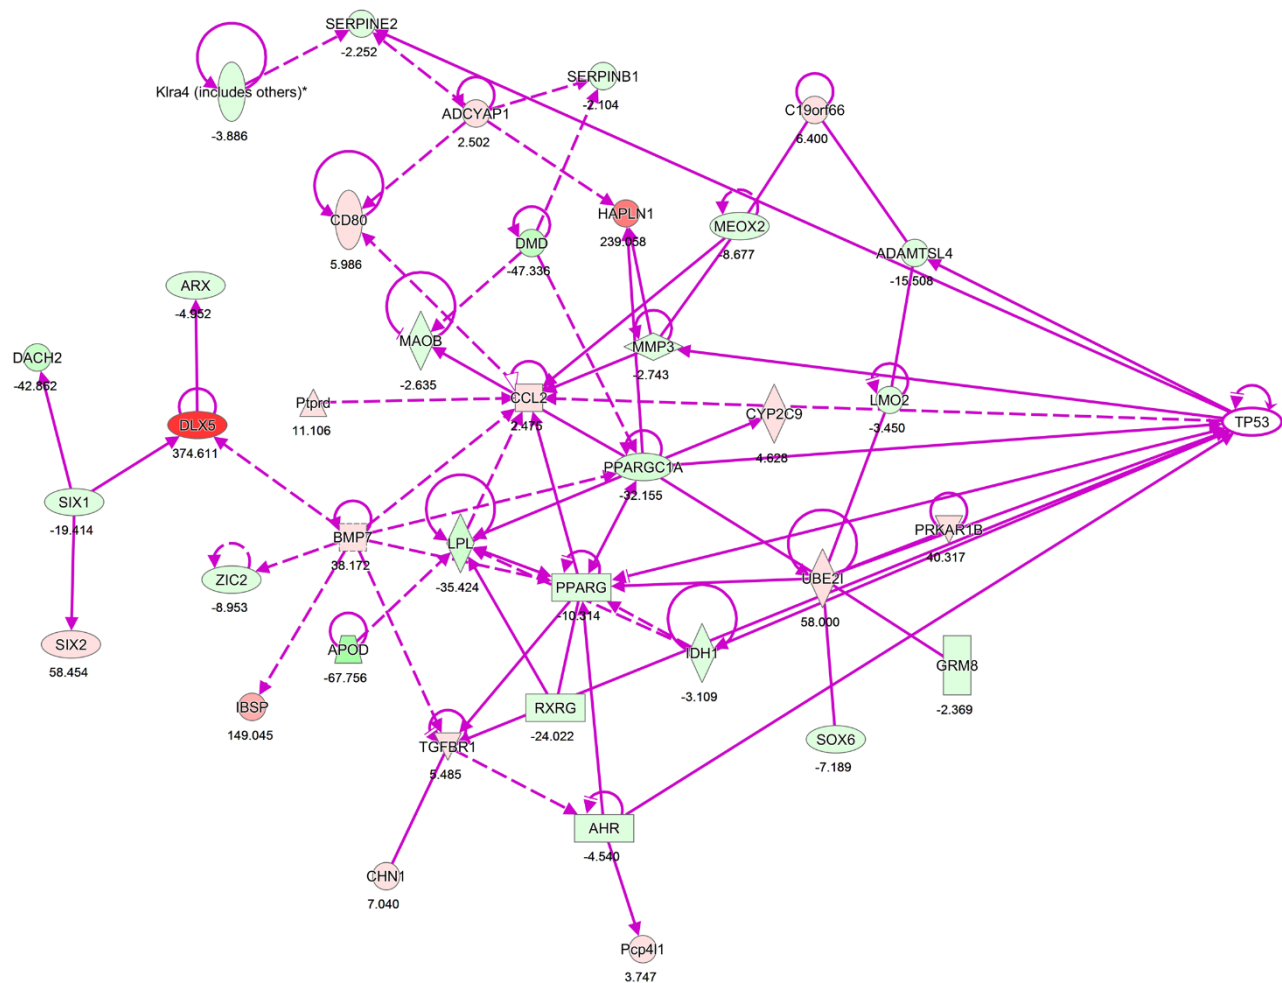

**Figure S1.** Genes obtained through both the ChIP-on-ChIP and microarray datasets were mapped to a protein interaction network with the central points set to *TP53*.

**A**

target2geo F10 --acagaatgggcaaatctaggaaggctgtgggttttccccctttggtctgaattaaga  
TTACAGAAGGTCCAAATTTAGAAAGGGTAGGGGTTTACCCCTTTGCTCTATATAAGAA  
\*\*\*\*\* \* \*\*\*\*\*,\*\*\*,\*\*\*\*\*, \* \*\*\*\*\* \*\*\*\*\* \*\*\*\*\* \*\* \*. \*

target2geo F10 atccaaactgttcctacgccacggttatgcactgggaagccaaaggcaactctgaccact  
GGCCAAAGGGTTCGAACCCCTTCGTTAATCCCGGGGAACCAAGGCCAATTAAGCCAAGG  
. \*\*\*\*\* \*\*\*\* \* \*. \*\* \* \* \* \*\*\*\*\* \*\*\*\*\*, \* \*\*\*, \* \* \* \*

target2geo F10 gttaaagcagtaggaagggttcttactagagacggctcttctgcctcctgagggggagggg  
GTAAACCAGTAGGAAGGG-TAGGAATAGAGACGGCTCTTCTGCCTCTGAGGGGAGGGG  
\*\* \*\* \*\*\*\*\* \* \* \*\*\*\*\* \*\*\*\*\* \*\*\*\*\* \*\*\*\*\*

target2geo F10 tgccgtcaggcatggaggaaggactggcctcgttgtcagtggtcacggctccatctgtca  
TGCCGTCAGGCATGAGGAAGG-----ACGCCTCC-----  
\*\*\*\*\* \*\*\*\*\* . \*. \*. \* \*\*\*\* \*

target2geo F10 gtgcatcaa  
-TGCGTCCC  
\*\*\*, \*\*

**B**

target4geo C11 -----ctccccatacatcag  
CCATACATCAGTCAGACATGAAGATCAGTCAAGCCGCTGCCGTCTCTCCCATACATCAG  
\*\*\*\*\*

target4geo C11 tcagacatgaagatcagtcagccgctgccgtcagagagaagctcatttctccaggggag  
TCAGACATGAAGATCAGTCAAACCGCTGCCGTGAGAGAGAAGTTTCATTTTCCAGGGGAG  
\*\*\*\*\* \*\*\*\*\* \*\*\*\*\* \*\*\*\*\* \*\*\*\*\*

target4geo C11 agg**cttacctcaaatatgttcgc**aggctcattgttgtactggttgatgatgattccgat  
AGGGTT**CCAT**CAAAATATGTT**GC**AGGCTCATTGTGTACTGGTTGGATATGATTCCGAT  
\*\*\* \*\* \* \*\*\*\*\* \*\*\*\*\* \*\*\*\*\* \*\*\*\*\*

target4geo C11 tggctgctacaccacttcaatccaccagaaagctgtctgtatccaagtcattcacatca  
TGGTCGCTACACCACTTCAATCCACCCAGAAAGCTGTCT-TATCCAG-----  
\*\*\*\*\* \*\*\*\*\*

target4geo C11 agttcagaaaggtaagttcaggaagatctgg  
-----CATGCTGAGGCAG-TACAA  
\*\* \*. \* \*\*\* \*\* \* ...

**Figure S2.** The sequences of *PGC-1α*-knockdown clones (F10 Target2 and C11 Target4). The sgRNA sequence is marked in blue.

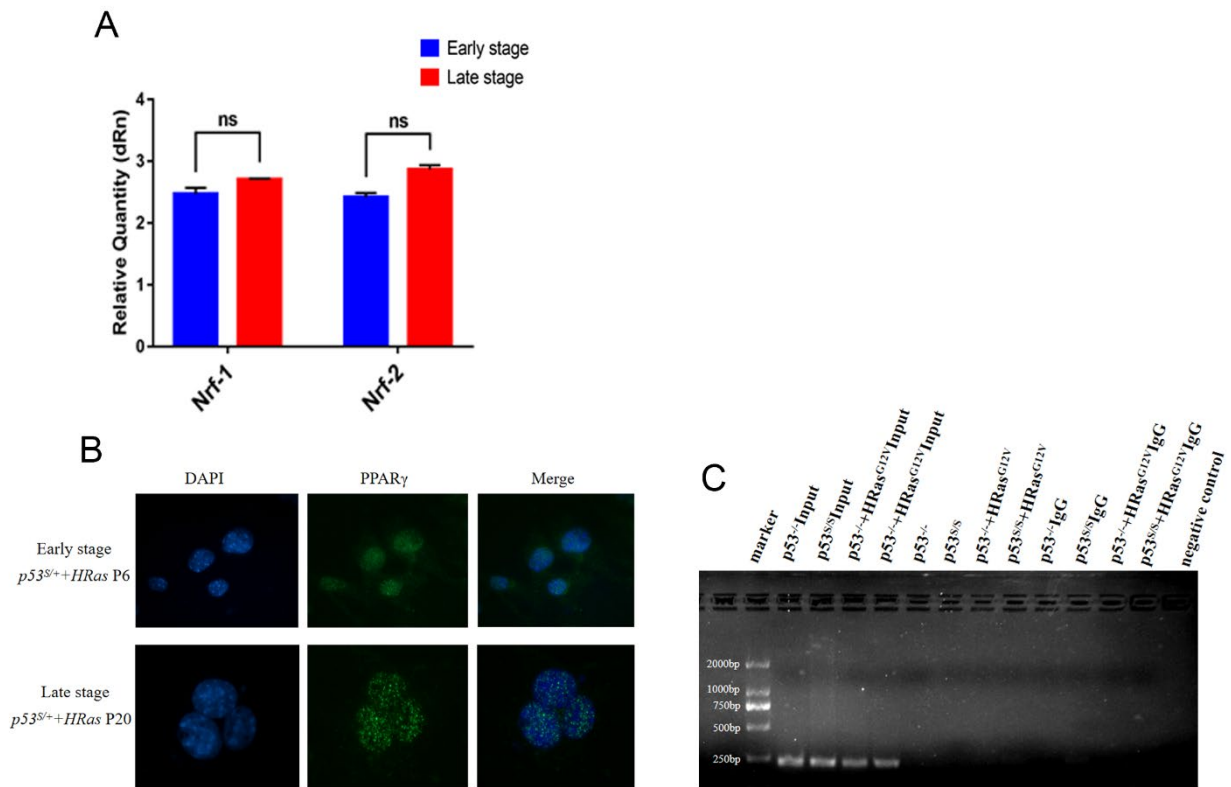

**Figure S3.** A: Real-time PCR was used to measure the expression levels of *Nrf-1* and *Nrf-2* in ES and LS cells. B: Immunostaining for PPAR $\gamma$  in ES and LS cells. C: A ChIP assay was performed to determine the ability of p53S to bind to the PPAR $\gamma$  promoter.
